# Supplementary material for: Marine-Derived Streptomyces sennicomposti GMY01 with Anti-Plasmodial and Anticancer Activities: Genome Analysis, In Vitro Bioassay, Metabolite Profiling, and Molecular Docking
Source: MDPI journal article supplement (doi:10.3390/microorganisms11081930), 2023-07-28
Supplement: s1 [file s1]

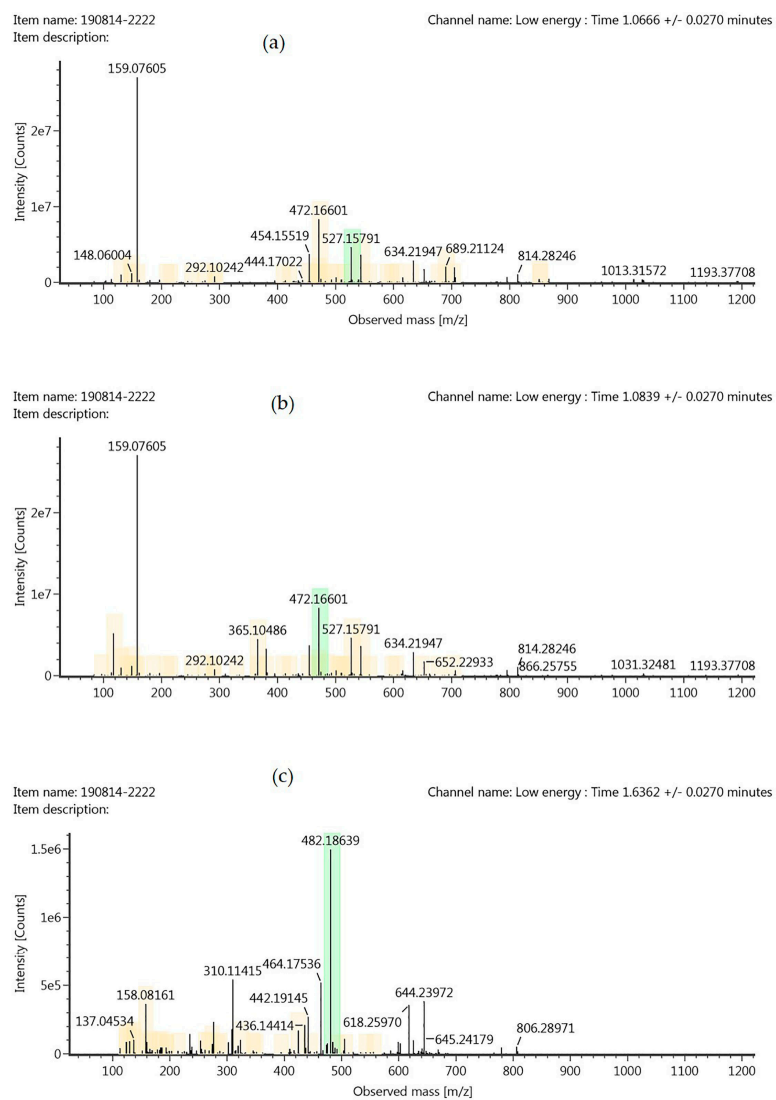

**Supplementary Figure S2.** The ionization mass spectra of all detected compounds of the methanolic extract of marine cell bacteria GMY01: a)  $C_{17}H_{29}NO_{14}$ , b)  $C_{19}H_{31}NO_{13}$ , and c) Mannotriose ( $C_{18}H_{32}O_{16}$ ). Mode: positive ion; scanning range: 50–1200 m/z
