# Supplementary material for: Marine-Derived Streptomyces sennicomposti GMY01 with Anti-Plasmodial and Anticancer Activities: Genome Analysis, In Vitro Bioassay, Metabolite Profiling, and Molecular Docking
Source: MDPI journal article supplement (doi:10.3390/microorganisms11081930), 2023-07-28
Supplement: s1 [file s1]

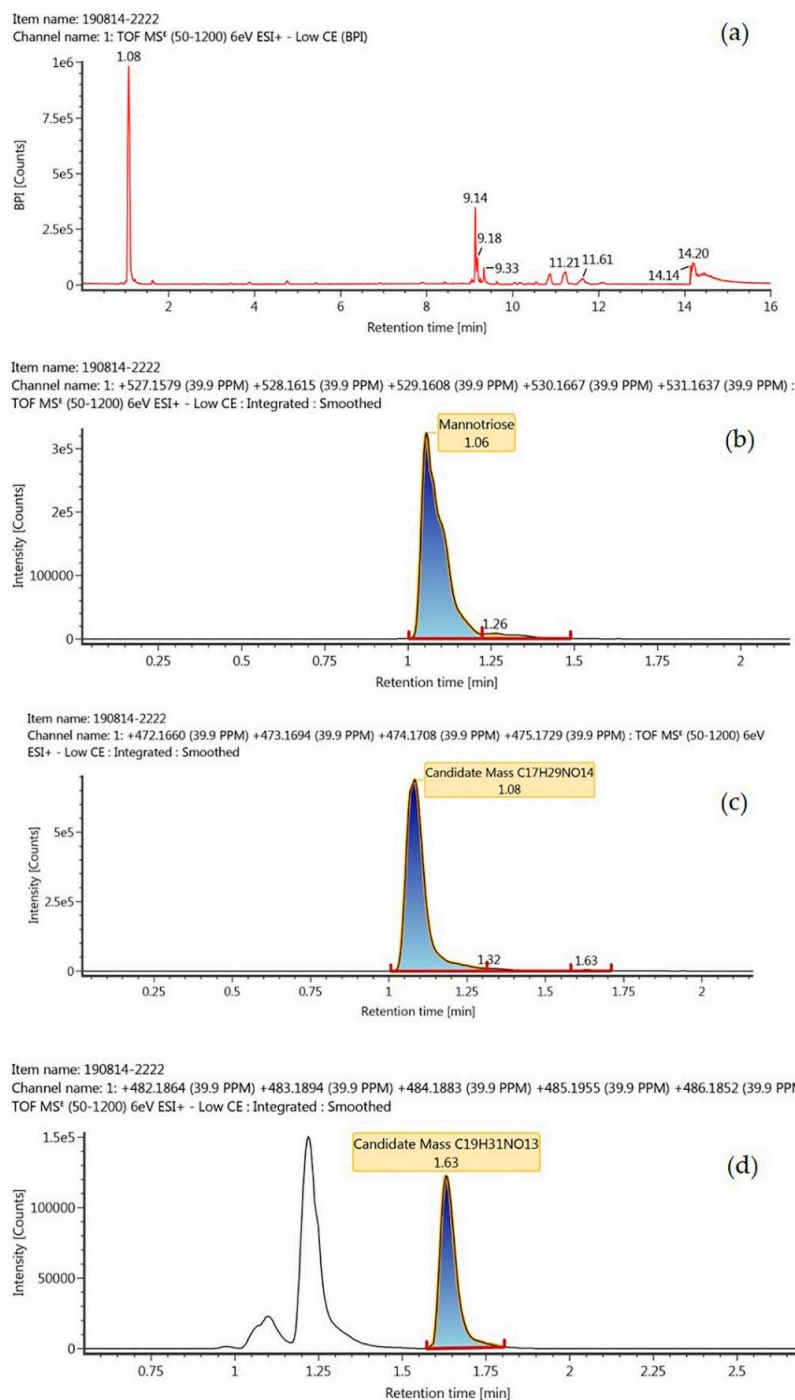

**Supplementary Figure S1.** LC-MS/MS analysis of methanolic active fraction of marine bacteria GMY01: a) spectra of LC-MS/MS, b) Mannotriose ( $C_{18}H_{32}O_{16}$ ) chromatogram, c)  $C_{17}H_{29}NO_{14}$  chromatogram, and d)  $C_{19}H_{31}NO_{13}$  chromatogram. Blank chromatogram at 9.14 – 14.20 of retention times.
