# Supplementary material for: Marine-Derived Streptomyces sennicomposti GMY01 with Anti-Plasmodial and Anticancer Activities: Genome Analysis, In Vitro Bioassay, Metabolite Profiling, and Molecular Docking
Source: Microorganisms. 2023 Jul 28;11(8):1930. doi: 10.3390/microorganisms11081930 (PMC10458361; doi:10.3390/microorganisms11081930)
Supplement: Supplementary file 1 [file microorganisms-11-01930-s001.zip]

Archive with 5 entries (5 files):
- Supplementary File Figure S1.pdf
- Supplementary File Figure S2.pdf
- Supplementary File Figure S3.pdf
- Supplementary Table S1_Type Strain Genome Server.xlsx
- Supplementary Table S2_Type Strain Genome Server (2).xlsx
