# Supplementary material for: Marine-Derived Streptomyces sennicomposti GMY01 with Anti-Plasmodial and Anticancer Activities: Genome Analysis, In Vitro Bioassay, Metabolite Profiling, and Molecular Docking
Source: Microorganisms. 2023 Jul 28;11(8):1930. doi: 10.3390/microorganisms11081930 (PMC10458361; doi:10.3390/microorganisms11081930)
Supplement: Supplementary file 1 [file microorganisms-11-01930-s001.zip › Supplementary Table S1_Type Strain Genome Server.xlsx]

## Sheet: Sheet1
Table S1. List of species and subspecies produced based on genome sequence analysis using Type Strain Genome Server (TYGS)
Type Strain Genome Server
TYGS ID	Kind	Species cluster	Subspecies cluster	Preferred name	Deposit	Authority	Other deposits	Synonymous taxon names	Base pairs	Percent G+C	No. proteins	Goldstamp	Bioproject accession	Biosample accession	Assembly accession	IMG OID	BacDive
14073	type strain	1	0	Streptomyces kebangsaanensis	SUK12	Sarmin et al. 2013 emend. Nouioui et al. 2018	NRRL B-24860; DSM 42048	Streptomyces kebangsaanensis	8220456	71.57	7704	Gp0118346	PRJNA224116	SAMN03254380	GCF_001906585		strain page
157893	type strain	2	1	Streptomyces avermitilis	DSM 46492	(ex Burg et al. 1979) Kim and Goodfellow 2002	NRRL 8165; NCIMB 12804; ATCC 31267; DSM 46492; JCM 5070; IFO 14893; NBRC 14893; MA-4680	Streptomyces avermectinius; Streptomyces avermitilis	8878093	70.76	7322		PRJNA299228	SAMN04193349	GCA_001514135		strain page
20568	type strain	3	2	Streptomyces koyangensis	VK-A60	Lee et al. 2005	DSM 41864; JCM 14915; NBRC 100598; KCCM 10555	Streptomyces koyangensis	7220839	73.03	5988	Gp0365742	PRJNA486241	SAMN09842183	GCA_003428925		strain page
20722	type strain	4	3	Streptomyces triticisoli	NEAU DSCPA1-4-4	Tian et al. 2018	DSM 105118; CCTCC AA 2017025	Streptomyces triticisoli	6833574	71.4	6336	Gp0393183	PRJNA454853	SAMN09043984	GCA_003270085		strain page
39112	type strain	5	4	Streptomyces matensis	JCM 4277	Margalith et al. 1959	NRRL B-2576; NRRL ISP-5188; NCIMB 9826; CBS 919.68; ATCC 23935; DSM 40188; JCM 4268; JCM 4651; IFO 12889; NBRC 12889; HAMBI 1048; IMET 42065; NCIB 9826; RIA 1142; RIA 570	Streptomyces matensis	7325782	72.63	6731		PRJDB10510	SAMD00245408	GCA_014649175		strain page
40132	type strain	6	5	Streptomyces naganishii	JCM 4654	Yamaguchi and Saburi 1955	NRRL B-1816; NRRL ISP-5282; CBS 923.68; ATCC 23939; DSM 40282; JCM 4190; IFO 12892; NBRC 12892; RIA 1196	Streptomyces naganishii	7762019	72.62	6962		PRJDB10510	SAMD00245495	GCA_014650575		strain page
40978	type strain	7	6	Streptomyces pilosus	JCM 4403	Ettlinger et al. 1958 emend. Komaki 2021	BCRC 12091; CCRC 12091; NRRL 2721; NRRL ISP-5097; CBS 549.68; ATCC 19797; DSM 40097; IFO 12807; NBRC 12807; VKM Ac-1765; ISP 5097; RIA 1076; UNIQEM 183	Streptomyces pilosus	7604882	72.48	6822		PRJDB10510	SAMD00245444	GCA_014649835		species page
41199	type strain	8	7	Streptomyces thermodiastaticus	JCM 4840	(Bergey et al. 1923) Waksman 1953	BCRC 12492; CCRC 12492; BCRC 12636; CCRC 12636; NRRL B-5316; NRRL ISP-5573; CBS 769.72; ATCC 27472; DSM 40573; NBRC 100020; HUT 6606; RIA 1429	Actinomyces thermodiastaticus; Streptomyces thermodiastaticus	6078574	72.5	5443		PRJDB10510	SAMD00245529	GCA_014656135		strain page
41298	type strain	9	8	Streptomyces spiralis	JCM 3302	(Falcão de Morais 1970) Goodfellow et al. 1986	NRRL B-16922; ATCC 25664; DSM 43836; IFO 14215; NBRC 14215; VKM Ac-1311; KCC 3302; KCC A-302	Elytrosporangium spirale; Streptomyces spiralis	9773725	71.28	8999		PRJDB10510	SAMD00245349	GCA_014654675		strain page
42434	type strain	10	9	Streptomyces anandii	JCM 4720	Batra and Bajaj 1965	BCRC 11825; CCRC 11825; KCTC 9687; NRRL B-12487; NRRL B-3590; NRRL ISP-5535; CBS 739.72; ATCC 19388; DSM 40535; IFO 13438; NBRC 13438; VKM Ac-1920; RIA 1399	Streptomyces anandii	7804303	72.35	7232		PRJDB10510	SAMD00245501	GCA_014650655		strain page
42535	type strain	11	10	Streptomyces massasporeus	JCM 4139	Shinobu and Kawato 1959	LMG 19362; BCRC 13647; CCRC 13647; AS 4.1433; CGMCC 4.1433; NRRL B-3300; NRRL ISP-5035; CBS 537.68; ATCC 19785; DSM 40035; JCM 4593; IFO 3841; IFO 12796; NBRC 3841; NBRC 12796; VKM Ac-578; RIA 1064; RIA 652; UNIQEM 171	Streptomyces massasporeus	9032628	71.31	8350		PRJDB10510	SAMD00245394	GCA_014648995		strain page
43992	type strain	12	11	Streptomyces fumigatiscleroticus	JCM 3101	(ex Pridham 1970) Goodfellow et al. 1986	BCRC 12344; CCRC 12344; NRRL B-3856; NCIMB 11004; CBS 639.66; ATCC 19345; DSM 43154; IFO 12999; NBRC 12999; CMI 117720; KCC 3101; KCC A-101; NCIB 11004; RIA 884	Chainia fumigata; Streptomyces fumigatiscleroticus	9406167	71.56	8475		PRJDB10510	SAMD00245311	GCA_014647975		strain page
48532	type strain	13	12	Streptomyces spectabilis	JCM 4308	Mason et al. 1961	LMG 5986; BCRC 12648; CCRC 12648; KCTC 9218; NRRL 2494; NRRL ISP-5512; NCIMB 9733; CBS 725.72; ATCC 27465; CECT 3146; DSM 40512; JCM 4308; JCM 4832; IFO 13424; IFO 15441; NBRC 13424; NBRC 15441; NCIB 9733; RIA 1385	Streptomyces spectabilis	10605690	72.1	9234		PRJDB10510	SAMD00245411	GCA_014649235		strain page
13428	type strain	14	13	Streptomyces spinoverrucosus	NBRC 14228	Diab and Al-Gounaim 1982	163MA; NRRL B-16932; NCIMB 11666; ATCC 33692; DSM 41648; JCM 5077; IFO 14228; IFO 14250; NBRC 14228; NBRC 14250; Diab 163MA; NCIB 11666	Streptomyces spinoverrucosus	9186555	70.7	8452		PRJDB6034	SAMD00097539	GCA_006539505		strain page
48559	type strain	14	13	Streptomyces spinoverrucosus	JCM 5077	Diab and Al-Gounaim 1982	163MA; NRRL B-16932; NCIMB 11666; ATCC 33692; DSM 41648; JCM 5077; IFO 14228; IFO 14250; NBRC 14228; NBRC 14250; Diab 163MA; NCIB 11666	Streptomyces spinoverrucosus	9222591	70.69	8531		PRJDB10510	SAMD00245552	GCA_014651195		strain page
75086	type strain	15	15	Streptomyces sennicomposti	RCPT1-4	Duangupama et al. 2022	TBRC 11260; NBRC 114303	Streptomyces sennicomposti	7341532	73.09	6103		PRJNA758547	SAMN21030501	GCA_019890635		species page
U424154	user strain	15	15	GCF 012933395.1 ASM1293339v1 genomic (GMY01)					7970865	73.22	6713
39110	type strain	16	14	Streptomyces thermoviolaceus subsp. apingens	JCM 4312	Henssen 1957	NCIMB 10077; CBS 140.67; ATCC 19994; DSM 41392; IFO 15459; NBRC 15459	Streptomyces thermoviolaceus subsp. apingens	5980351	72.6	5289		PRJDB10510	SAMD00245412	GCA_014649255		strain page
48556	type strain	16	14	Streptomyces thermoviolaceus	JCM 4843	Henssen 1957	LMG 14943; LMG 19359; BCRC 12493; CCRC 12493; BCRC 12639; CCRC 12639; AS 4.1471; CGMCC 4.1471; NRRL B-12374; NRRL ISP-5443; NCIMB 10076; CBS 278.66; CBS 688.72; ATCC 19283; DSM 40443; JCM 4337; JCM 4843; IFO 13905; NBRC 13905; VKM Ac-1857; HAMBI 1006; HUT 6604; IMET 43353; NCIB 10076; RIA 1348	Streptomyces thermoviolaceus; Streptomyces thermoviolaceus subsp. thermoviolaceus	5854876	72.61	5203		PRJDB10510	SAMD00245530	GCA_014650975		strain page
8851	type strain	16	14	Streptomyces thermoviolaceus	NBRC 13905	Henssen 1957	LMG 14943; LMG 19359; BCRC 12493; CCRC 12493; BCRC 12639; CCRC 12639; AS 4.1471; CGMCC 4.1471; NRRL B-12374; NRRL ISP-5443; NCIMB 10076; CBS 278.66; CBS 688.72; ATCC 19283; DSM 40443; JCM 4337; JCM 4843; IFO 13905; NBRC 13905; VKM Ac-1857; HAMBI 1006; HUT 6604; IMET 43353; NCIB 10076; RIA 1348	Streptomyces thermoviolaceus; Streptomyces thermoviolaceus subsp. thermoviolaceus	5883289	72.63	4870		PRJNA613987	SAMN14423144	GCA_012034235		strain page
