# Supplementary material for: Marine-Derived Streptomyces sennicomposti GMY01 with Anti-Plasmodial and Anticancer Activities: Genome Analysis, In Vitro Bioassay, Metabolite Profiling, and Molecular Docking
Source: Microorganisms. 2023 Jul 28;11(8):1930. doi: 10.3390/microorganisms11081930 (PMC10458361; doi:10.3390/microorganisms11081930)
Supplement: Supplementary file 1 [file microorganisms-11-01930-s001.zip › Supplementary Table S2_Type Strain Genome Server (2).xlsx]

## Sheet: Sheet1
Table S2. Pairwise comparisons of Streptomyces sp. GMY01 genomes vs. type-strain genomes
Type Strain Genome Server
Query strain	Subject strain	dDDH (d0, in %)	C.I. (d0, in %)	dDDH (d4, in %)	C.I. (d4, in %)	dDDH (d6, in %)	C.I. (d6, in %)	G+C content difference (in %)
'GCF 012933395.1 ASM1293339v1 genomic'	Streptomyces sennicomposti RCPT1-4	78.9	[74.9 - 82.4]	82.3	[79.4 - 84.8]	82.4	[79.0 - 85.3]	0.13
'GCF 012933395.1 ASM1293339v1 genomic'	Streptomyces spiralis JCM 3302	33	[29.7 - 36.6]	32	[29.6 - 34.5]	31.7	[28.7 - 34.8]	1.94
'GCF 012933395.1 ASM1293339v1 genomic'	Streptomyces naganishii JCM 4654	35.7	[32.3 - 39.2]	31	[28.6 - 33.5]	33.6	[30.7 - 36.7]	0.6
'GCF 012933395.1 ASM1293339v1 genomic'	Streptomyces kebangsaanensis SUK12	31.4	[28.0 - 35.0]	31	[28.6 - 33.5]	30.1	[27.2 - 33.2]	1.65
'GCF 012933395.1 ASM1293339v1 genomic'	Streptomyces triticisoli NEAU DSCPA1-4-4	31.7	[28.3 - 35.3]	30.9	[28.5 - 33.4]	30.4	[27.4 - 33.4]	1.82
'GCF 012933395.1 ASM1293339v1 genomic'	Streptomyces anandii JCM 4720	35.7	[32.4 - 39.3]	30.6	[28.2 - 33.1]	33.6	[30.6 - 36.7]	0.87
'GCF 012933395.1 ASM1293339v1 genomic'	Streptomyces thermodiastaticus JCM 4840	33	[29.7 - 36.6]	29	[26.6 - 31.5]	31	[28.1 - 34.1]	0.71
'GCF 012933395.1 ASM1293339v1 genomic'	Streptomyces thermoviolaceus JCM 4843	32.8	[29.4 - 36.4]	28.8	[26.4 - 31.3]	30.8	[27.9 - 33.9]	0.61
'GCF 012933395.1 ASM1293339v1 genomic'	Streptomyces thermoviolaceus NBRC 13905	32.8	[29.4 - 36.3]	28.7	[26.4 - 31.2]	30.8	[27.9 - 33.9]	0.59
'GCF 012933395.1 ASM1293339v1 genomic'	Streptomyces thermoviolaceus subsp. apingens JCM 4312	32.8	[29.4 - 36.4]	28.7	[26.4 - 31.2]	30.8	[27.9 - 33.9]	0.62
'GCF 012933395.1 ASM1293339v1 genomic'	Streptomyces fumigatiscleroticus JCM 3101	27.2	[23.9 - 30.8]	27.6	[25.2 - 30.1]	26.1	[23.2 - 29.2]	1.65
'GCF 012933395.1 ASM1293339v1 genomic'	Streptomyces spinoverrucosus JCM 5077	25.9	[22.5 - 29.5]	27.2	[24.9 - 29.7]	24.9	[22.0 - 28.0]	2.53
'GCF 012933395.1 ASM1293339v1 genomic'	Streptomyces spinoverrucosus NBRC 14228	25.9	[22.5 - 29.5]	27.2	[24.9 - 29.7]	24.9	[22.0 - 28.0]	2.52
'GCF 012933395.1 ASM1293339v1 genomic'	Streptomyces massasporeus JCM 4139	26.8	[23.5 - 30.5]	27	[24.6 - 29.5]	25.7	[22.8 - 28.8]	1.91
'GCF 012933395.1 ASM1293339v1 genomic'	Streptomyces pilosus JCM 4403	27.1	[23.7 - 30.7]	26.7	[24.4 - 29.2]	25.8	[23.0 - 28.9]	0.74
'GCF 012933395.1 ASM1293339v1 genomic'	Streptomyces matensis JCM 4277	28.2	[24.9 - 31.8]	26.5	[24.2 - 29.0]	26.7	[23.8 - 29.8]	0.59
'GCF 012933395.1 ASM1293339v1 genomic'	Streptomyces avermitilis DSM 46492	25.2	[21.9 - 28.9]	26	[23.6 - 28.5]	24.2	[21.4 - 27.3]	2.46
'GCF 012933395.1 ASM1293339v1 genomic'	Streptomyces spectabilis JCM 4308	20.1	[16.9 - 23.7]	23.8	[21.5 - 26.3]	19.7	[16.9 - 22.7]	1.12
'GCF 012933395.1 ASM1293339v1 genomic'	Streptomyces koyangensis VK-A60	20.6	[17.4 - 24.2]	23.2	[20.9 - 25.7]	20	[17.3 - 23.1]	0.19
